# Supplementary material for: Novel risk genes identified in a genome-wide association study for coronary artery disease in patients with type 1 diabetes
Source: Springer Nature journal article supplement (doi:10.1186/s12933-018-0705-0), 2018-04-25
Supplement: MOESM4 [file 15718338]

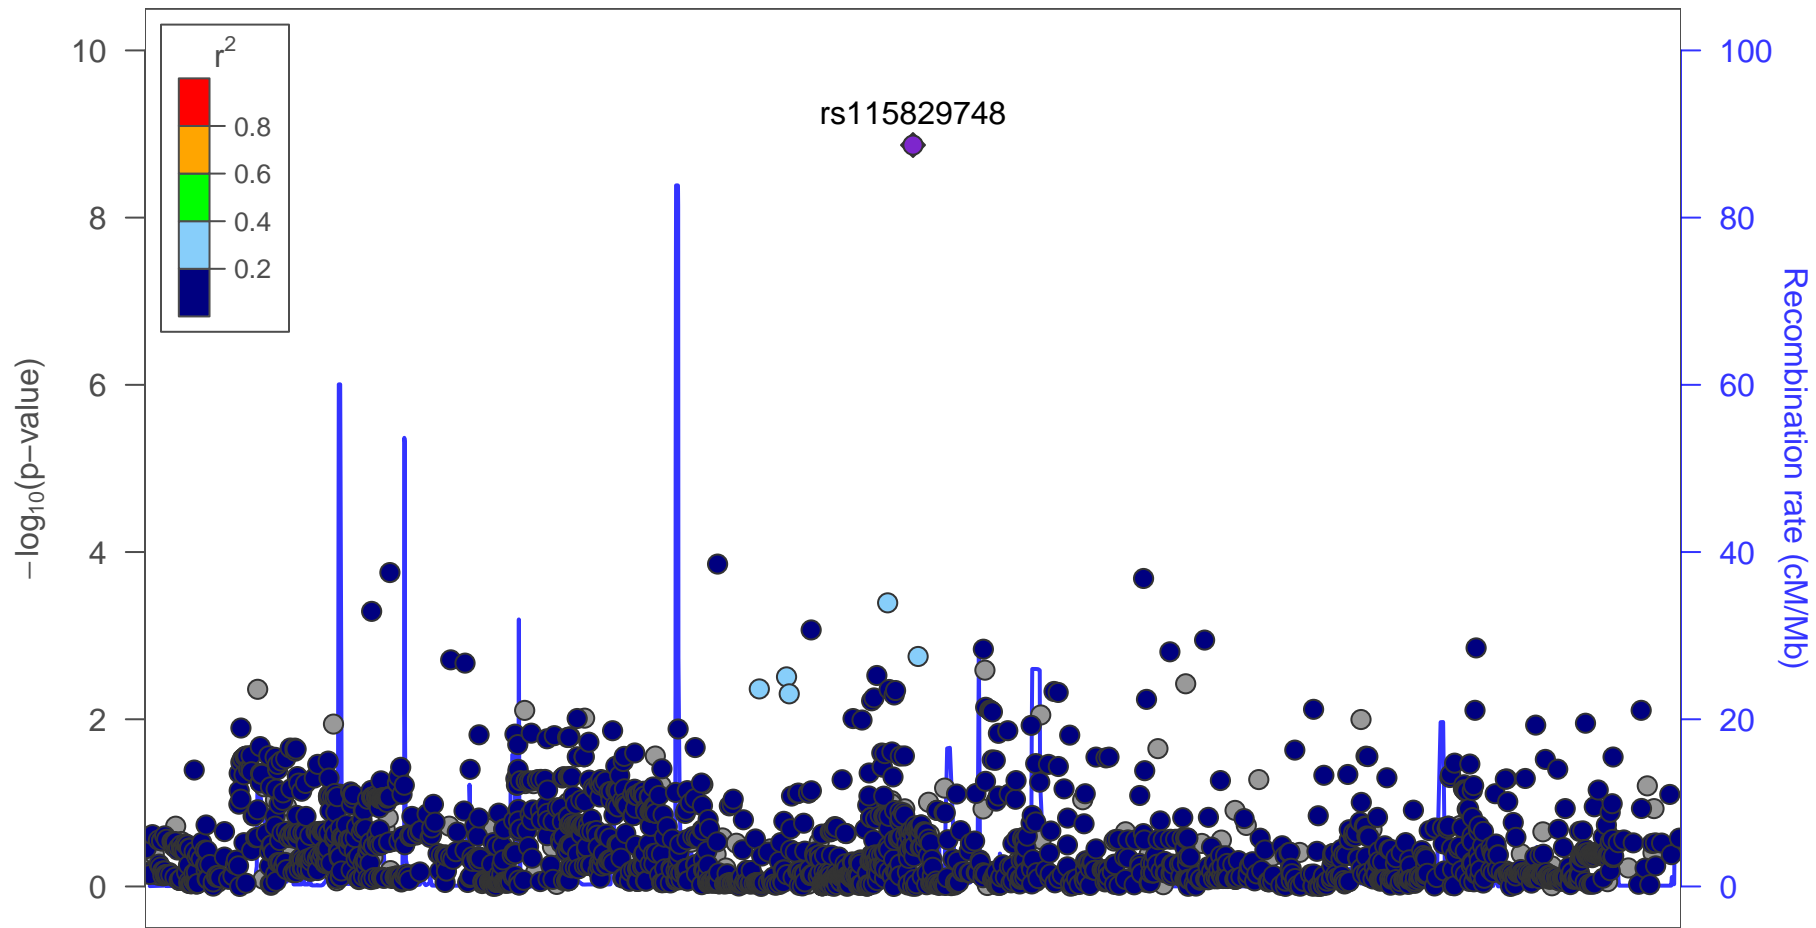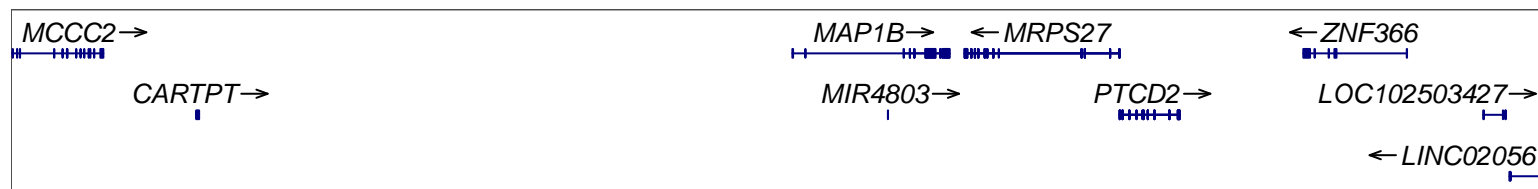

71                      71.2                      71.4                      71.6                      71.8

Position on chr5 (Mb)

date: Mon Aug 28 19:52:41 2017

build: hg19

display range: chr5:70894387–71894387 [70894387–71894387]

hilite range: 0 – 0 [ 0 – 0 ]

reference SNP: chr5:71394387

number of SNPs plotted: 2315

min P-value: 1.35E–9 [chr5:71394387]

max P-value: 9.99E–1 [chr5:71381885]
