# Supplementary material for: Novel risk genes identified in a genome-wide association study for coronary artery disease in patients with type 1 diabetes
Source: Springer Nature journal article supplement (doi:10.1186/s12933-018-0705-0), 2018-04-25
Supplement: MOESM7 [file 15718338]

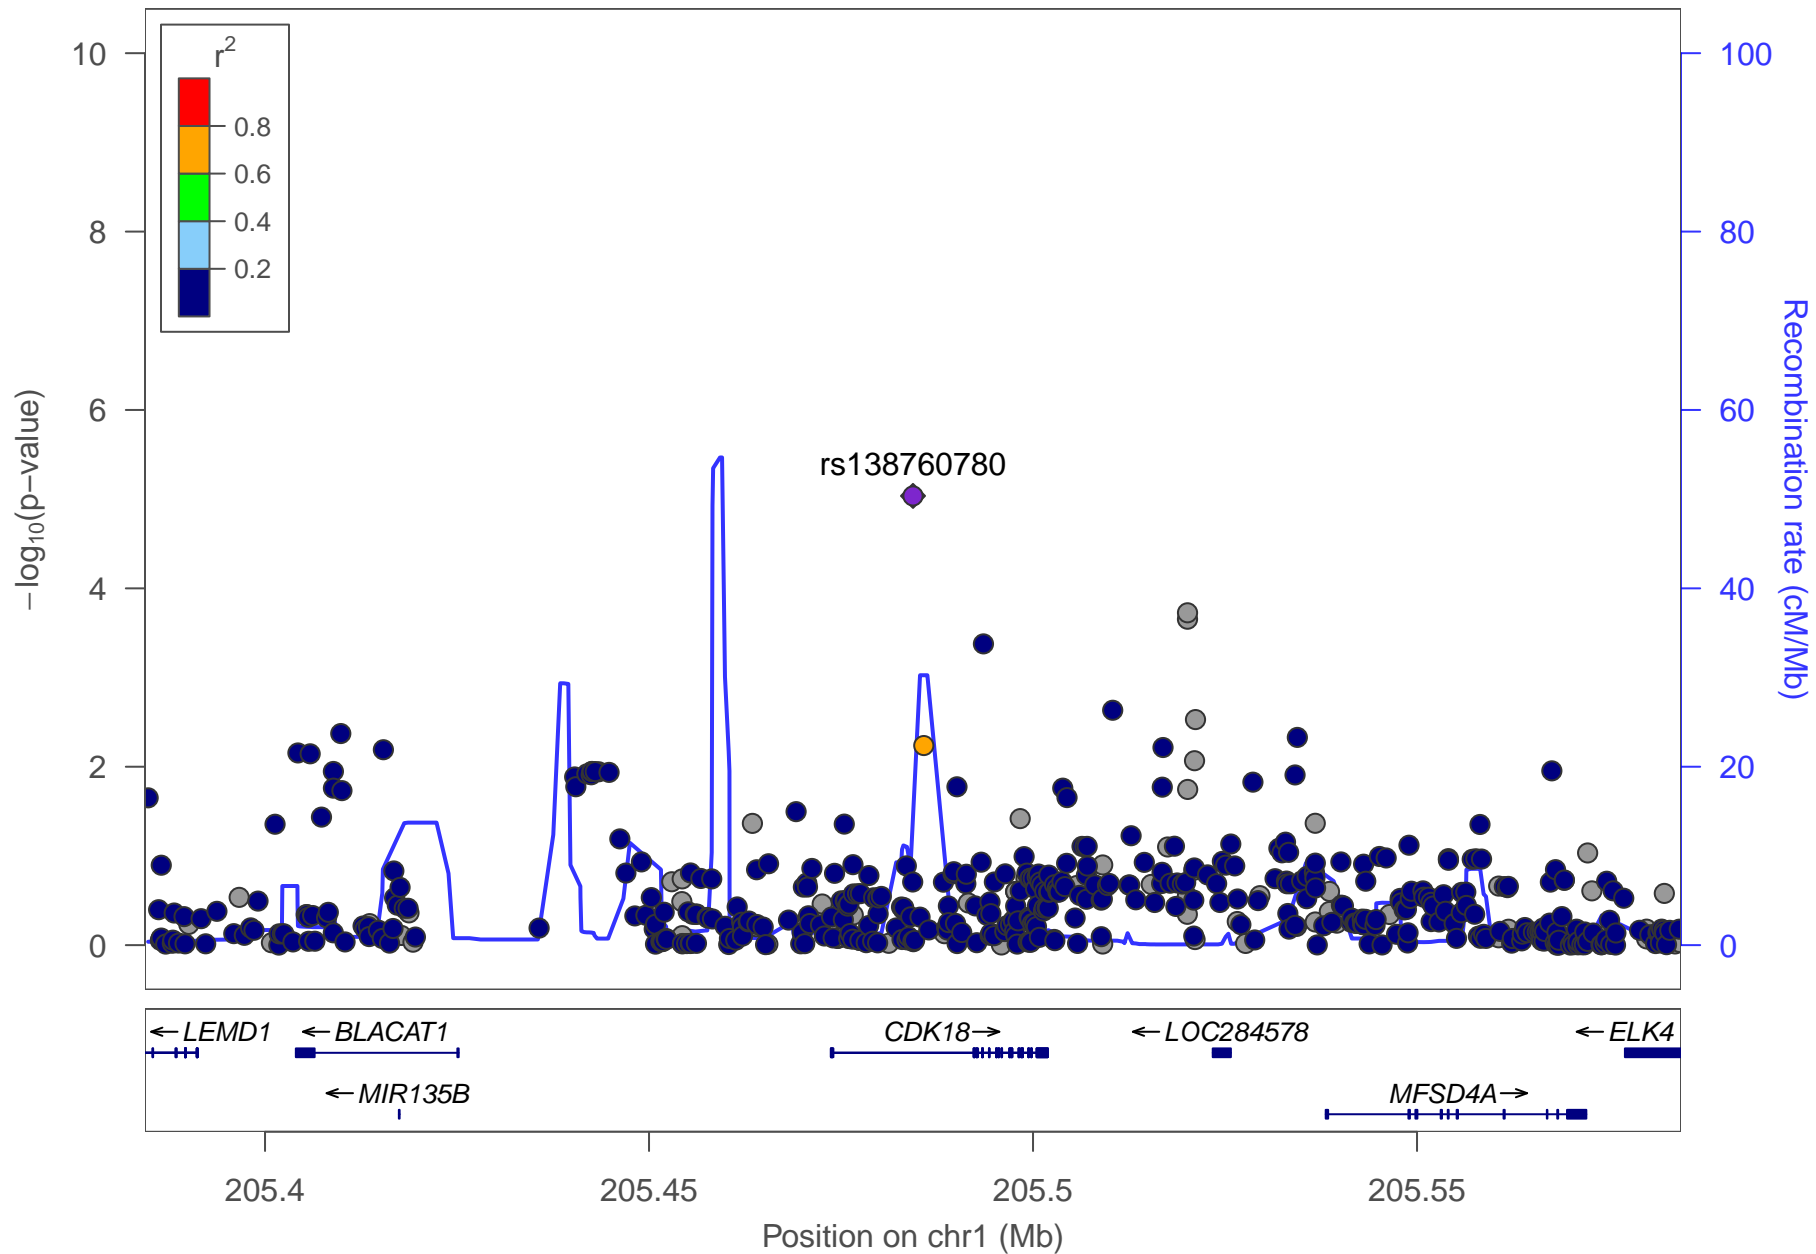

date: Mon Aug 28 19:27:20 2017

build: hg19

display range: chr1:205384373–205584373 [205384373–205584373]

hilite range: 0 – 0 [ 0 – 0 ]

reference SNP: chr1:205484373

number of SNPs plotted: 517

min P-value:  $9.2E-6$  [chr1:205484373]

max P-value:  $10E-1$  [chr1:205568438]
