# Supplementary material for: Novel risk genes identified in a genome-wide association study for coronary artery disease in patients with type 1 diabetes
Source: Springer Nature journal article supplement (doi:10.1186/s12933-018-0705-0), 2018-04-25
Supplement: MOESM8 [file 15718338]

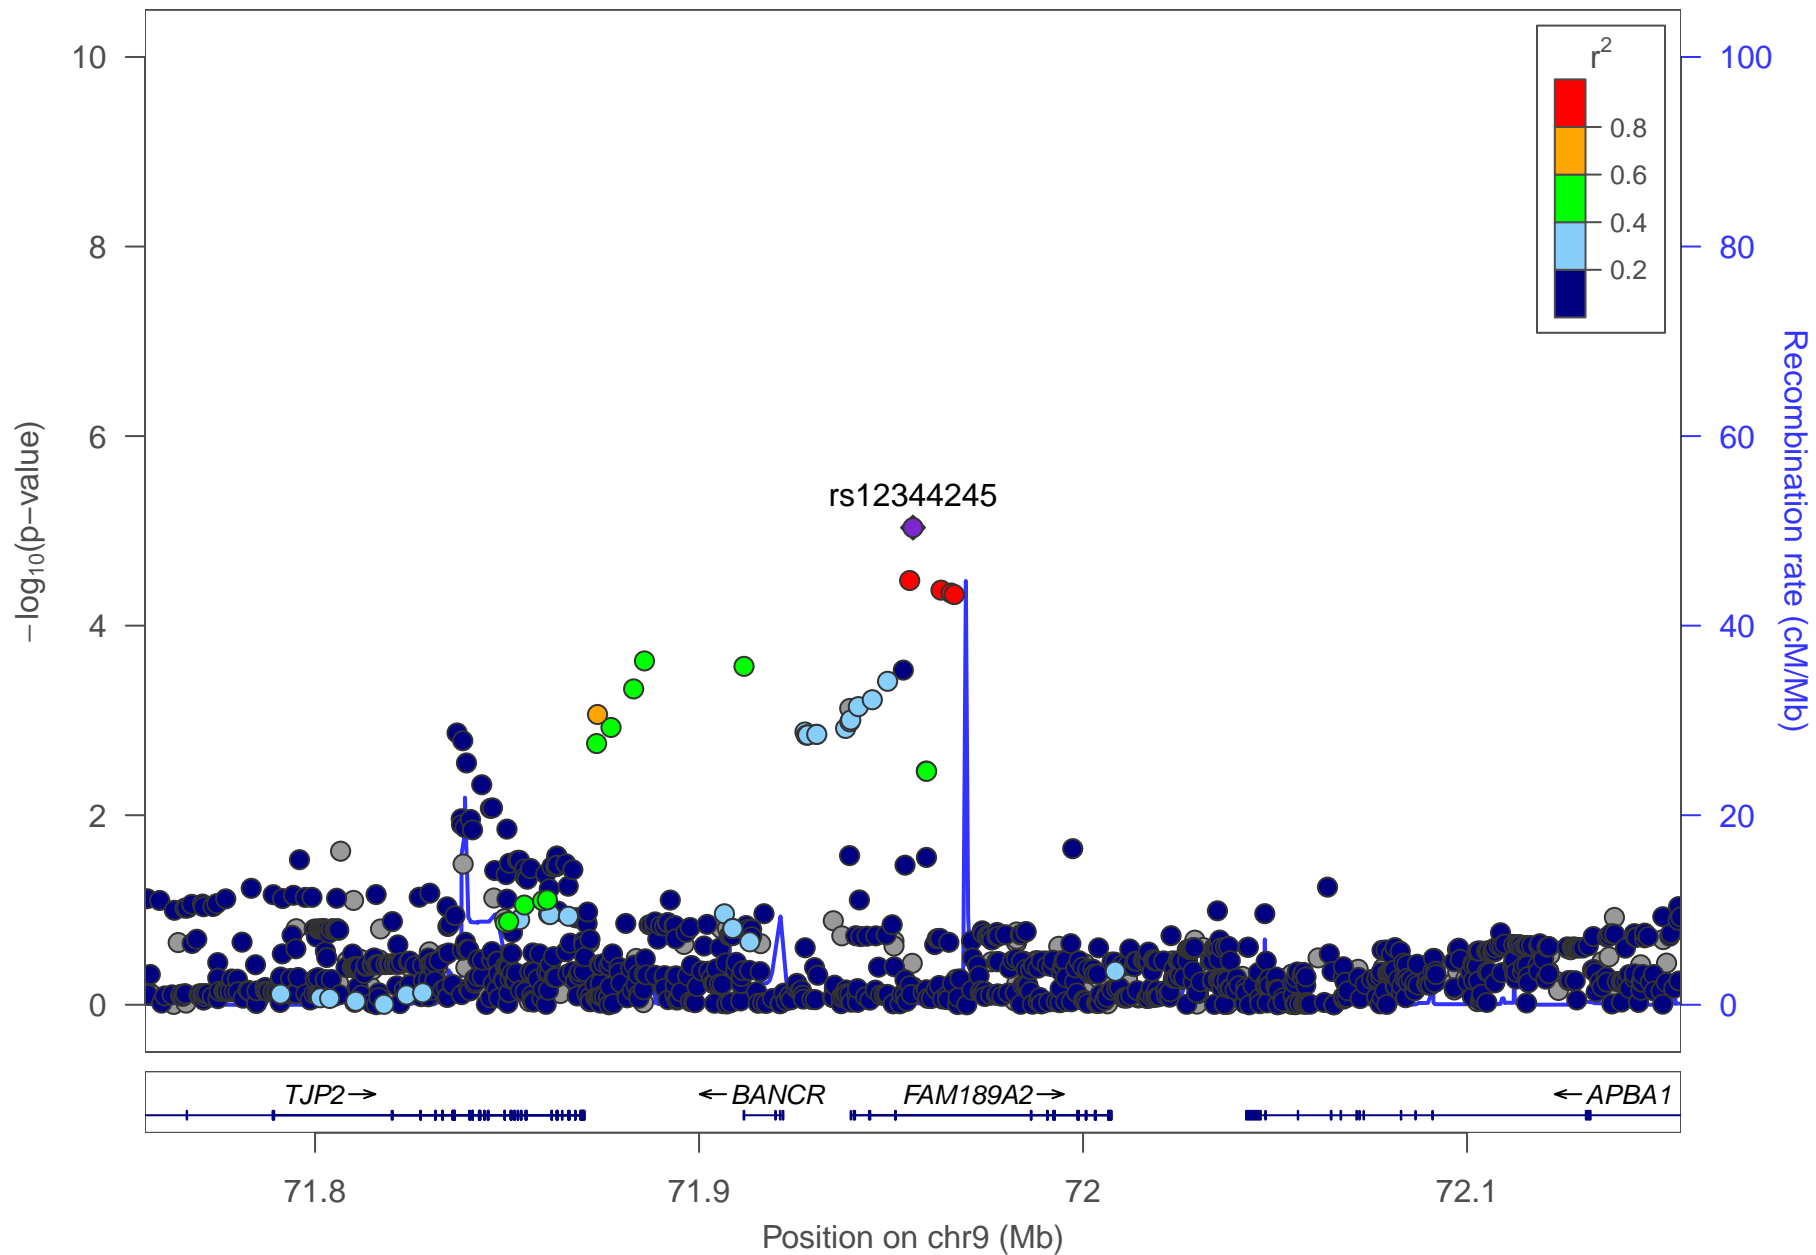

date: Thu Aug 31 19:43:53 2017

build: hg19

display range: chr9:71755717–72155717 [71755717–72155717]

hilite range: 0 – 0 [ 0 – 0 ]

reference SNP: chr9:71955717

number of SNPs plotted: 1218

min P-value: 9.23E–6 [chr9:71955717]

max P-value: 10E–1 [chr9:71969717]
