# Supplementary material for: Novel risk genes identified in a genome-wide association study for coronary artery disease in patients with type 1 diabetes
Source: Cardiovasc Diabetol. 2018 Apr 25;17:61. doi: 10.1186/s12933-018-0705-0 (PMC5916834; doi:10.1186/s12933-018-0705-0)
Supplement: Supplementary file 5 — Additional file 5: Table S2. Imputation quality of SNPs with association p-values < 1.0 × 10-5 in the discovery cohorts. [file 12933_2018_705_MOESM5_ESM.xlsx]

## Sheet: Feuil1
			Imputaton quality r2
Chr	Bp	RS	After-EU	Genesis/Genediab	UK-ROI
1	205484373	rs138760780	0.68327	0.3505	0.7037
2	97455276	rs116656846	0.97302	0.9105	0.9470
2	155225182	rs17206992	0.62465	0.5642	0.6741
2	177645590	rs113517532	0.92773	0.9301	0.9343
3	13370674	rs73018809	0.71929	0.7360	0.7425
3	103975418	rs28641753	0.91403	0.8516	0.8653
4	6171230	rs78031527	0.53244	0.4510	0.5447
5	10500646	rs143537377	0.69846	0.7942	0.7066
5	71394387	rs115829748	0.68457	0.5436	0.7374
6	95557471	rs9354144	0.97082	0.9784	0.9729
8	73842523	rs571622299	0.69012	0.7583	0.6546
9	37034095	rs143723948	0.44432	0.3675	0.4671
9	71955717	rs12344245	0.85142	0.7736	0.7560
10	19457387	rs117826205	0.83709	0.7512	0.8288
11	8080425	rs61879614	0.45325	0.4281	0.5170
16	2160973	rs116092985	0.70245	0.7573	0.7402
17	4328164	rs34319244	0.78924	0.7758	0.8010
18	45399356	rs113114656	0.58597	0.5309	0.6067
21	21347156	rs67213764	0.98390	0.9785	0.9722
21	24929109	rs12482425	0.90908	0.9470	0.9433
22	25988780	rs373009901	0.41393	0.6330	0.4798
