# Supplementary material for: Novel risk genes identified in a genome-wide association study for coronary artery disease in patients with type 1 diabetes
Source: Cardiovasc Diabetol. 2018 Apr 25;17:61. doi: 10.1186/s12933-018-0705-0 (PMC5916834; doi:10.1186/s12933-018-0705-0)
Supplement: Supplementary file 6 — Additional file 6: Table S3. Imputation quality of the established CAD associated SNPs in the discovery cohorts. [file 12933_2018_705_MOESM6_ESM.xlsx]

## Sheet: QC_SNPs_replicationC4D
			Imputaton quality r2
Chr	Bp	RS	After-EU	Genesis/Genediab	UK-ROI
1	55496039	rs11206510	0.99727	0.9922	1.0154
1	56965664	rs9970807	1.00048	1	1.0091
1	109817192	rs7528419	1.00048	0.9998	1.0316
1	151762308	rs11810571	0.97264	0.9752	0.9651
1	169094459	rs1892094	0.99111	0.9898	0.9699
1	200646073	rs6700559	0.99964	1	1.0299
1	201872264	rs2820315	0.97737	0.9854	0.9979
1	222762709	rs17464857	1.00021	1	0.9911
2	19942473	rs16986953	1.00035	0.9988	1.018
2	21303470	rs7567217	0.94305	0.9532	0.9399
2	85788175	rs7568458	0.97847	0.978	0.9578
2	145286559	rs17678683	0.78777	0.704	0.771
2	145801461	rs2252641	1.00010	0.9997	1.0403
2	216304384	rs1250229	1.00031	0.9997	0.9675
2	218683154	rs2571445	0.99982	0.9996	1.0457
2	233633460	rs1801251	1.00047	0.9999	1.0189
3	49448566	rs7623687	0.97643	0.9618	0.9246
3	124475201	rs142695226	0.92988	0.9085	0.9572
3	138099161	rs201477372	0.99835	0.999	1.0244
3	153839866	rs12493885	1.00049	0.9984	1.0279
4	57838583	rs17087335	1.00006	1	1.0657
4	81181072	rs10857147	0.93215	0.9481	0.9952
4	120909501	rs7678555	0.89108	0.8771	0.8791
4	148281001	rs4593108	0.98690	0.9838	1.056
4	148393664	rs1878406	0.90790	0.8912	0.9717
4	156639888	rs72689147	0.99722	0.9972	0.9709
5	131667353	rs273909	1.00039	0.999	0.9788
5	142516897	rs246600	0.95414	0.9074	0.9656
6	12903957	rs9349379	0.99933	0.9985	0.9931
6	12909874	rs7454157	0.95667	0.9708	0.8941
6	22612629	rs6909752	0.97450	0.959	0.9786
6	31888367	rs3130683	0.99958	0.9967	1.0022
6	35034800	rs17609940	0.98678	0.9898	0.9724
6	39134099	rs56336142	0.98399	0.9862	0.9807
6	39174922	rs10947789	1.00048	0.9973	0.9948
6	134173151	rs12202017	0.99506	0.9937	0.992
6	134214525	rs12190287	0.80491	0.8063	0.8716
6	160863532	rs2048327	1.00002	0.9999	1.0155
6	160961137	rs3798220	0.99881	0.9992	0.9833
6	161005610	rs55730499	0.96460	0.9748	0.9635
6	161123451	rs4252185	0.74073	0.6674	0.8156
6	161143608	rs4252120	1.00045	1	1.0189
7	19036775	rs2023938	0.99865	0.9991	0.9842
7	19049388	rs2107595	0.86909	0.906	0.8568
7	107091849	rs12539895	0.93946	0.9562	0.94
7	107244545	rs10953541	1.00048	0.9996	1.0179
7	129663496	rs11556924	0.99975	0.9993	1.0008
7	139757136	rs10237377	0.77425	0.8088	0.7881
7	150690176	rs3918226	0.86608	0.7722	0.7936
8	19813180	rs264	0.99852	0.999	1.0336
8	126490972	rs2954029	0.95048	0.9739	0.9471
9	22003223	rs3217992	1.00023	0.999	1.0298
9	22098619	rs2891168	0.99450	0.9992	1.0168
9	136141870	rs2519093	0.99779	0.9935	0.9905
10	30323892	rs2487928	0.95499	0.9616	0.8992
10	44549767	rs2624695	0.98394	0.9867	0.995
10	44753867	rs501120	1.00046	1	0.9826
10	90989279	rs11203043	0.98990	0.996	0.9847
10	91002927	rs1412444	0.99864	0.9998	1.0189
10	104604916	rs11191416	0.99593	0.9876	1.0049
11	10745394	rs11042937	0.99855	0.9985	1.0082
11	13303071	rs3993105	0.99177	0.9891	0.9679
11	65391317	rs12801636	1.00008	0.9978	1.0131
11	75274150	rs590121	0.93453	0.9314	0.9414
13	28973621	rs9319428	1.00045	1	1.0203
13	110960712	rs4773144	0.99926	0.9992	0.9568
13	111040681	rs11838776	0.87764	0.8181	0.8215
13	111049623	rs9515203	0.75475	0.6229	0.7639
14	100145710	rs10139550	0.87002	0.8858	0.8427
15	65024204	rs6494488	0.83215	0.7594	0.7791
15	67455630	rs56062135	0.97093	0.9711	0.9668
15	79141784	rs7173743	1.00047	1	1.0247
15	89574218	rs8042271	0.61517	0.6503	0.5391
15	91416550	rs17514846	0.99085	0.9984	1.0133
16	56995236	rs1800775	1.00007	0.9995	0.9779
16	72130815	rs1050362	0.99591	0.9954	0.986
16	83045790	rs7500448	0.88180	0.8958	0.9025
17	2126504	rs216172	0.99452	0.9922	1.0213
17	17543722	rs12936587	1.00008	0.999	1.0039
17	45013271	rs17608766	0.99973	0.9987	0.9927
17	46987665	rs999474	1.00035	0.9995	1.0384
17	59013488	rs7212798	0.95483	0.9901	0.9622
17	62387091	rs1867624	0.96017	0.9685	1.0001
18	57838401	rs663129	0.99772	0.9968	0.98
19	11163601	rs1122608	1.00041	0.9997	0.9883
19	11188247	rs56289821	0.99633	0.9994	0.9987
19	32882020	rs12976411	0.83436	0.9262	0.8434
19	41854534	rs8108632	0.90543	0.9195	0.8969
19	45395619	rs2075650	1.00042	0.997	0.9738
19	45415640	rs445925	1.00030	0.9963	0.9807
19	45422946	rs4420638	0.99952	0.9966	1.0167
19	46190268	rs1964272	0.96216	0.9841	0.9062
20	33764554	rs867186	0.99936	0.9969	0.9835
21	35593827	rs28451064	0.81902	0.7562	0.8069
22	24658858	rs180803	0.47632	0.685	0.4228
