# Supplementary material for: Novel risk genes identified in a genome-wide association study for coronary artery disease in patients with type 1 diabetes
Source: Cardiovasc Diabetol. 2018 Apr 25;17:61. doi: 10.1186/s12933-018-0705-0 (PMC5916834; doi:10.1186/s12933-018-0705-0)
Supplement: Supplementary file 9 — Additional file 9: Figure S6. Regional association plot at the PKD1 locus. [file 12933_2018_705_MOESM9_ESM.pdf]

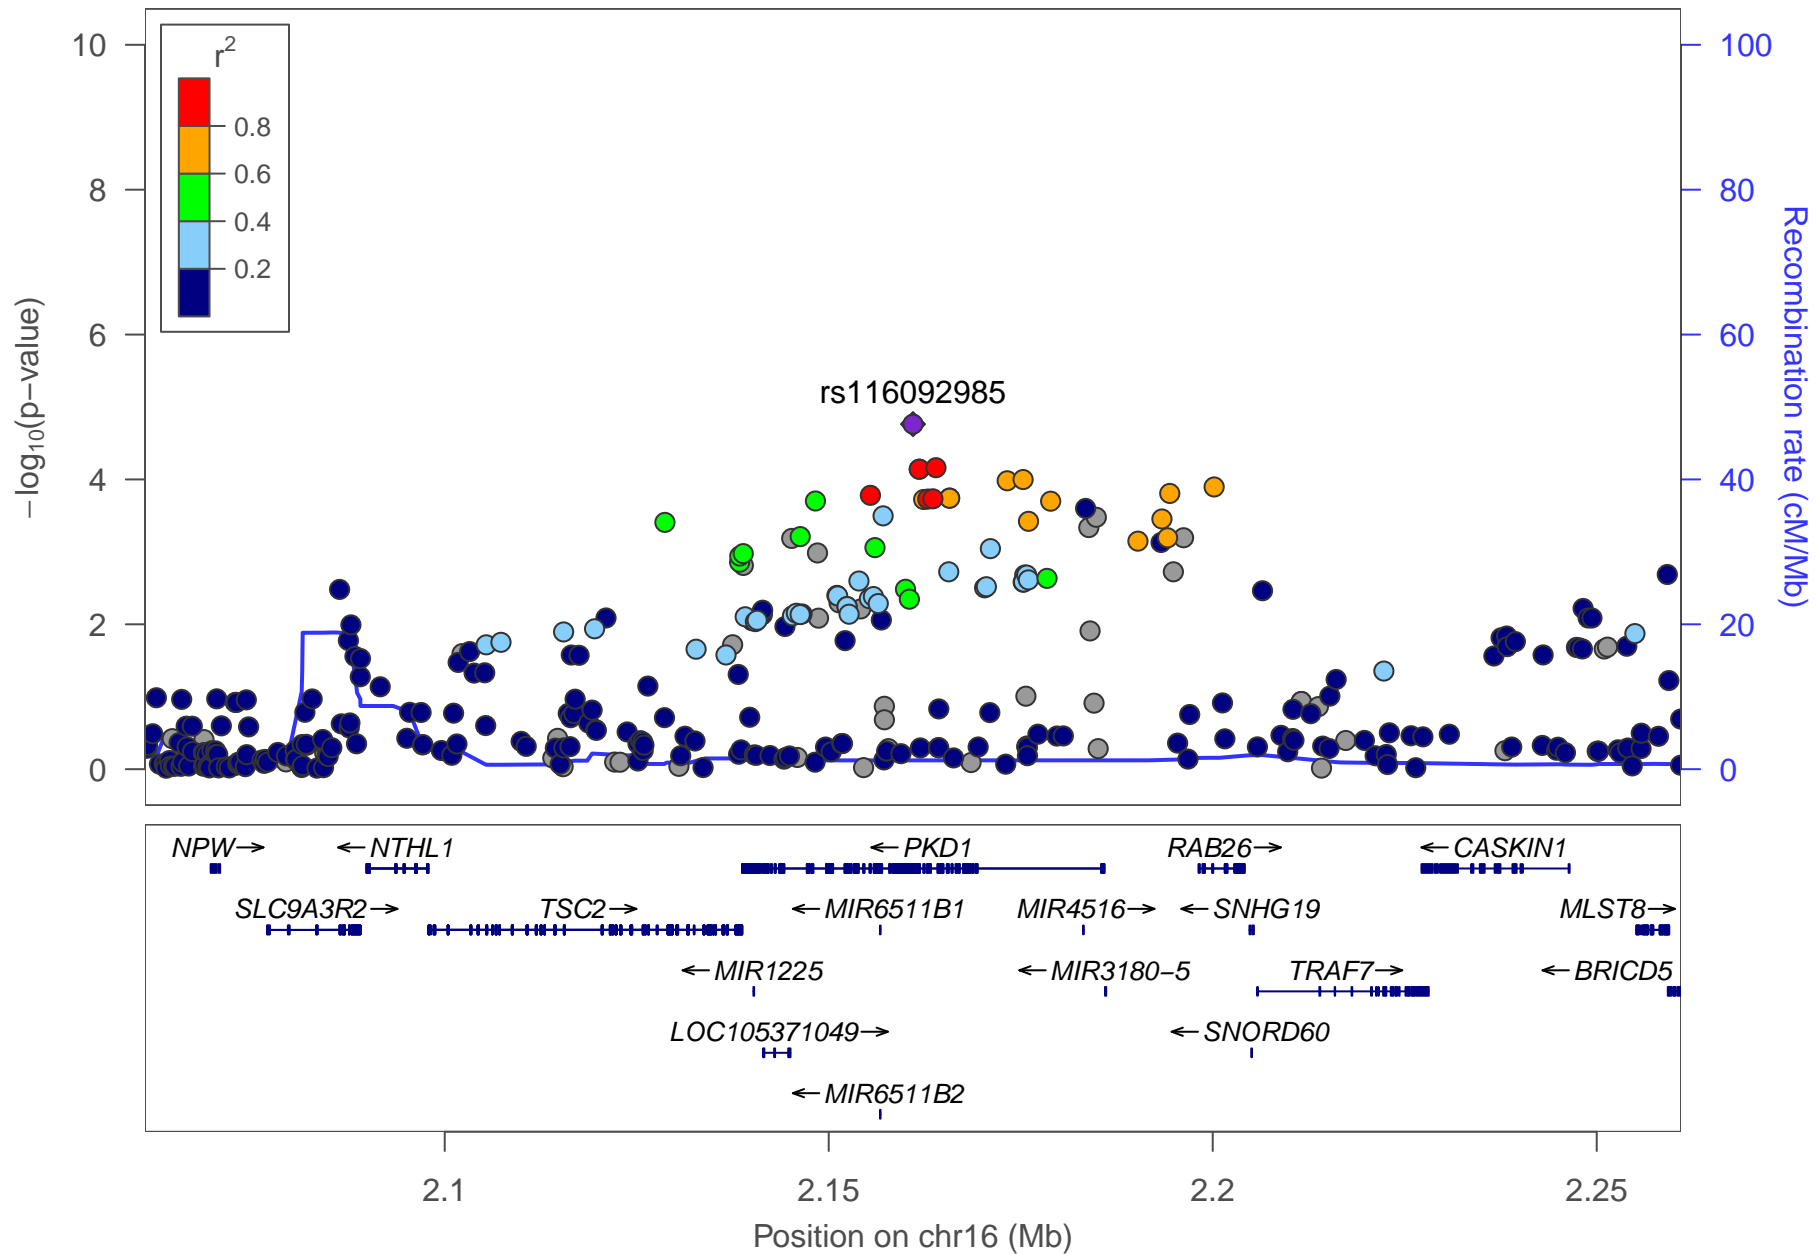

date: Mon Aug 28 19:52:53 2017

build: hg19

display range: chr16:2060973–2260973 [2060973–2260973]

hilite range: 0 – 0 [ 0 – 0 ]

reference SNP: chr16:2160973

number of SNPs plotted: 334

min P-value: 1.72E–5 [chr16:2160973]

max P-value: 9.69E–1 [chr16:2063733]
